# Supplementary material for: Role of the orientation of –OH groups in the sensitivity and selectivity of the interaction of M2+ with ribosyl- and galactosyl-imino-conjugates
Source: Royal Society of Chemistry journal article supplement (doi:10.1039/b903668g), 2009-01-01
Supplement: b903668g.pdf [file b903668g.pdf]

## Supporting Information

### **Role of the orientation of –OH groups on sensitivity and selectivity of the interaction of $M^{2+}$ with ribosyl- and galctosyl-imino-conjugates: Solution recognition studies of $M^{2+}$ in MeOH and selective recognition of $Cu^{2+}$ in HEPES buffer, and first crystal structure determination of dinuclear-Cu(II) complexes based on both the glyco-imino-conjugates**

Nitin K. Singhal,<sup>a</sup> Atanu Mitra,<sup>a</sup> G. Rajsekhar,<sup>a</sup> Mobin M. Shaikh,<sup>a</sup> Subodh Kumar,<sup>a</sup> Philippe Guionneau<sup>b</sup> and Chebrolu P. Rao<sup>a,\*</sup>

<sup>a</sup>Bioinorganic Laboratory, Department of Chemistry, Indian Institute of Technology Bombay, Powai, Mumbai – 400 076, India. E-mail: [cprao@iitb.ac.in](mailto:cprao@iitb.ac.in)

<sup>b</sup>Institut de Chimie la Matiere Condensee de Bordeaux, UPR 9048 CNRS 87 Av. Dr. A Schweitzer, 33608 Pessac Cedex, France

### SI 01 Synthesis and characterization of L<sub>1</sub>, L<sub>2</sub> and L<sub>3</sub>

**N-(O-hydroxynaphthalen-1-yl)-β-D- ribopyranosylamine (L<sub>1</sub>):** To an ethanolic suspension of crude β-D-ribopyranosyl-C1-NH<sub>2</sub> (1.325g, 8.83 mmol), α-hydroxynaphthaldehyde (1.549 g, 9 mmol) was added and then reaction mixture was stirred for 12 hrs. The solid separated from clear solution was filtered and washed with cold ethanol until the washings were free from impurities.

**N-(2-hydroxybenzylidene)- β- D-galactopyranosylamine (L<sub>2</sub>)** to a suspension of β-D-galactopyranosyl-C1-deoxy-C1-amine (galactosyl-C1-NH<sub>2</sub>, 3.86 g, 20 mmol) in 45 ml ethanol, salicylaldehyde (R'-CHO, 2.2 ml, 20.96 mmol) was added and the reaction mixture was allowed to reflux for 6 hrs. During the course of reflux, yellow solid was formed. The reaction mixture was allowed to cool at room temperature and was left as such overnight. Some more solid was formed which was then separated by filtration and washed with a small portion of methanol and then with petroleum ether. The filtrate was concentrated to dryness and dichloromethane as added to dissolve the pasty mass. To that petroleum ether was added to result in a second crop of solid. Yield: 5.2g, 85%; IR (KBr): 3394(b)  $\nu_{(O-H)}$  and  $\nu_{(N-H)}$ , 2938(S), 2935(S) and 2920(S)  $\nu_{(C-H)}$ , 1631(S)  $\delta_{(CH=N)}$ .cm<sup>-1</sup>; <sup>1</sup>H NMR (DMSO-d<sub>6</sub>):  $\delta$  3.250-3.780(m, 5H, C2-H, C3-H, C4-H, C5-H), 4.363-4.384(d, H, <sup>3</sup>J<sub>CH1-CH2</sub>, 8.239Hz C1-H), 4.538-5.146(d, 3H, C2-OH, C3-OH, & C4-OH), 4.660-4.687(t, H, C6-OH), 6.89-7.59(m, 4H, Ar-OH), 8.34(S, H, CH=N), 13.257(S, H, Ar-H)ppm. FABMS: m/z 180 ([M+H]<sup>+</sup>, 90%), 179 ([M]<sup>+</sup>, 30%). Anal. calcd. for [C<sub>13</sub>H<sub>17</sub>O<sub>6</sub>N.H<sub>2</sub>O]: C, 55.14; H, 6.00; N, 4.95 found C, 55.08; H, 6.12; N, 5.10.

**N-(o-hydroxynaphthalen-1-yl)-β-D- galactopyranosylamine(L<sub>3</sub>)-** To a suspension of β-D- galactopyranosyl-C1-deoxy-C1-amine (galactosyl-C1-NH<sub>2</sub>, 3.86 g, 20 mmol) in 45 ml ethanol, β-hydroxy naphthaldehyde (R-CHO; 2.2 g, 20.96 mmol) was added and then the reaction mixture was allowed to reflux for 6 h. During the course of reflux, yellow solid was formed. The reaction mixture was allowed to cool at room temperature and was left as such overnight. Some more solid was formed which was then separated by filtration and washed with a small portion of methanol and then with petroleum ether. Yield, (4.01g, 70%); IR (KBr): 3320(b)  $\nu_{(O-H)}$  and  $\nu_{(N-H)}$ , 2940(S), 2975(S) and 2910(S)  $\nu_{(C-H)}$ , 1660(S)  $\delta_{(CH=N)}$ .cm<sup>-1</sup>; <sup>1</sup>H NMR(DMSO-d<sub>6</sub>): 3.12-3.57(m, 6H, C2-H, C3-H, C4-H, C6-H), 3.72-3.75(m, H, C5-H), 4.36-5.38(m, 4H, C2-OH, C3-OH, C4-OH, C6-OH), 4.62(d, H, <sup>3</sup>J<sub>C1-H-C2-H</sub> 11.02 Hz, C1-H), 6.77-7.81(m, 6H, Ar-H), 8.11(S, H, CH=N), 14.21(S, H, Phenol-OH) ppm; <sup>13</sup>C NMR(DMSO-d<sub>6</sub>):  $\delta$  91.10(C1), 60.68-77.76(C2-C6), 106.20-137.52(Ar-10C), 158.10(CH=N) ppm; FABMS: m/z 334 ([M+H]<sup>+</sup>, 70%), 333 ([M]<sup>+</sup>, 40%) Anal. calcd. for C<sub>17</sub>H<sub>21</sub>O<sub>6</sub>N: C, 61.24; H, 5.75; N, 4.20 found C, 61.22; H, 6.00; N, 3.94.

<sup>1</sup>H NMR, FT IR and mass spectra are given in figures F 01a, F 01b and F 01c respectively for L<sub>1</sub>, L<sub>2</sub> and L<sub>3</sub>.

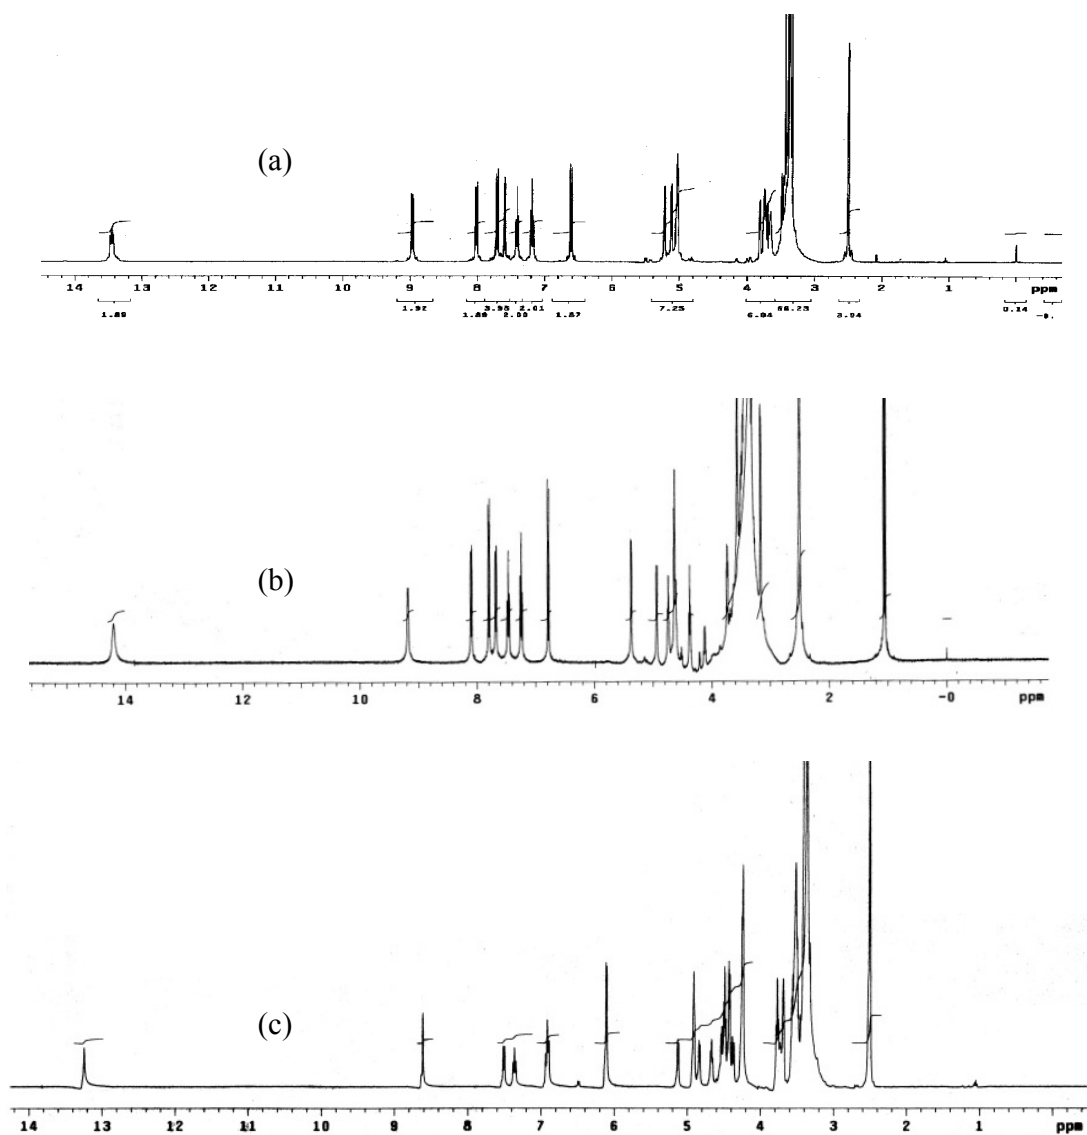

Figure F 01a. (a)  $^1\text{H}$  NMR  $L_1$ , (b)  $L_2$  and (c)  $L_3$  in  $\text{DMSO-d}_6$ .

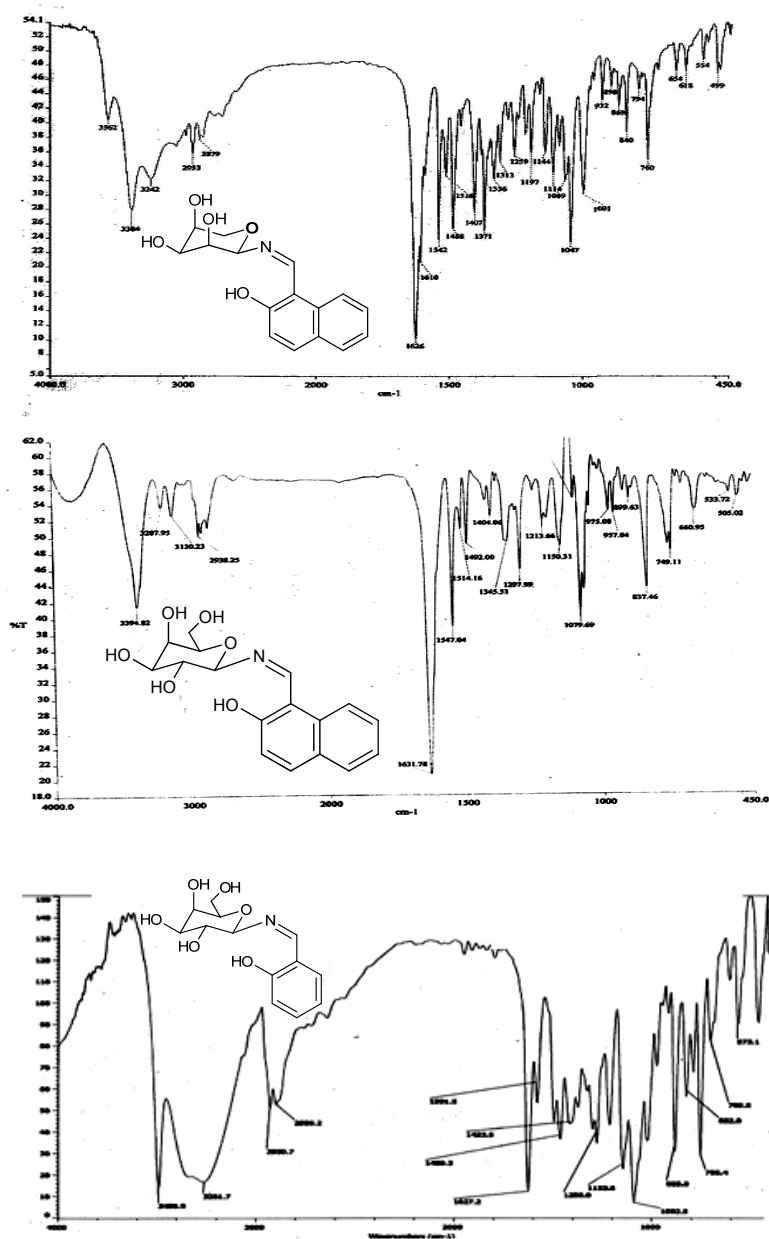

Figure F 01b. FR-IR spectra for: L<sub>1</sub> (top); L<sub>2</sub> (middle); L<sub>3</sub> (bottom) in KBr matrix.

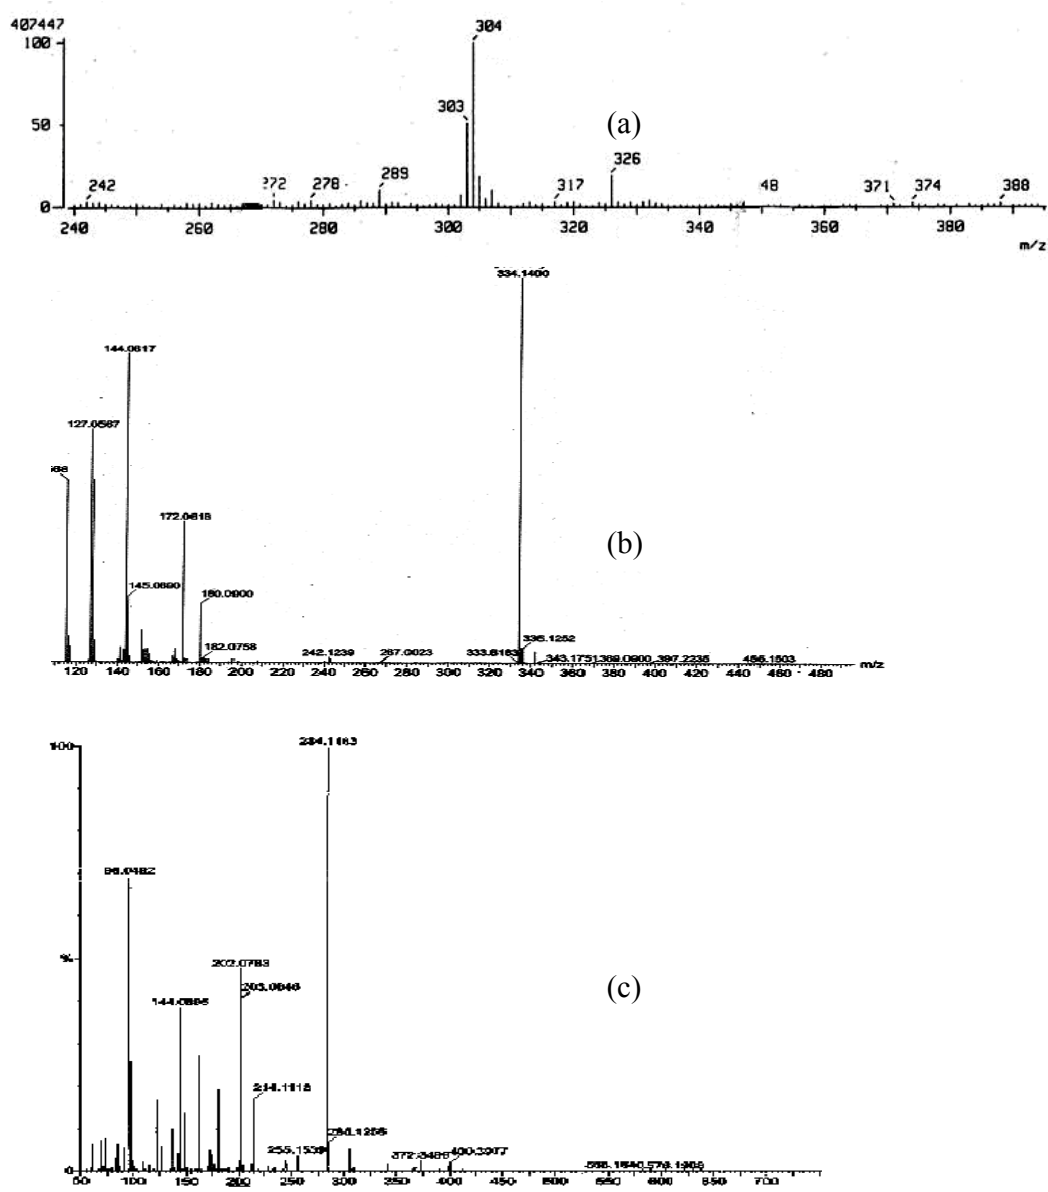

Figure F 01c. FAB mass spectra: (a) L<sub>1</sub>, (b) L<sub>2</sub> and (c) L<sub>3</sub>.

SI 02a: Absorption titration of  $L_1$  against  $M^{2+}$  in  $CH_3OH$

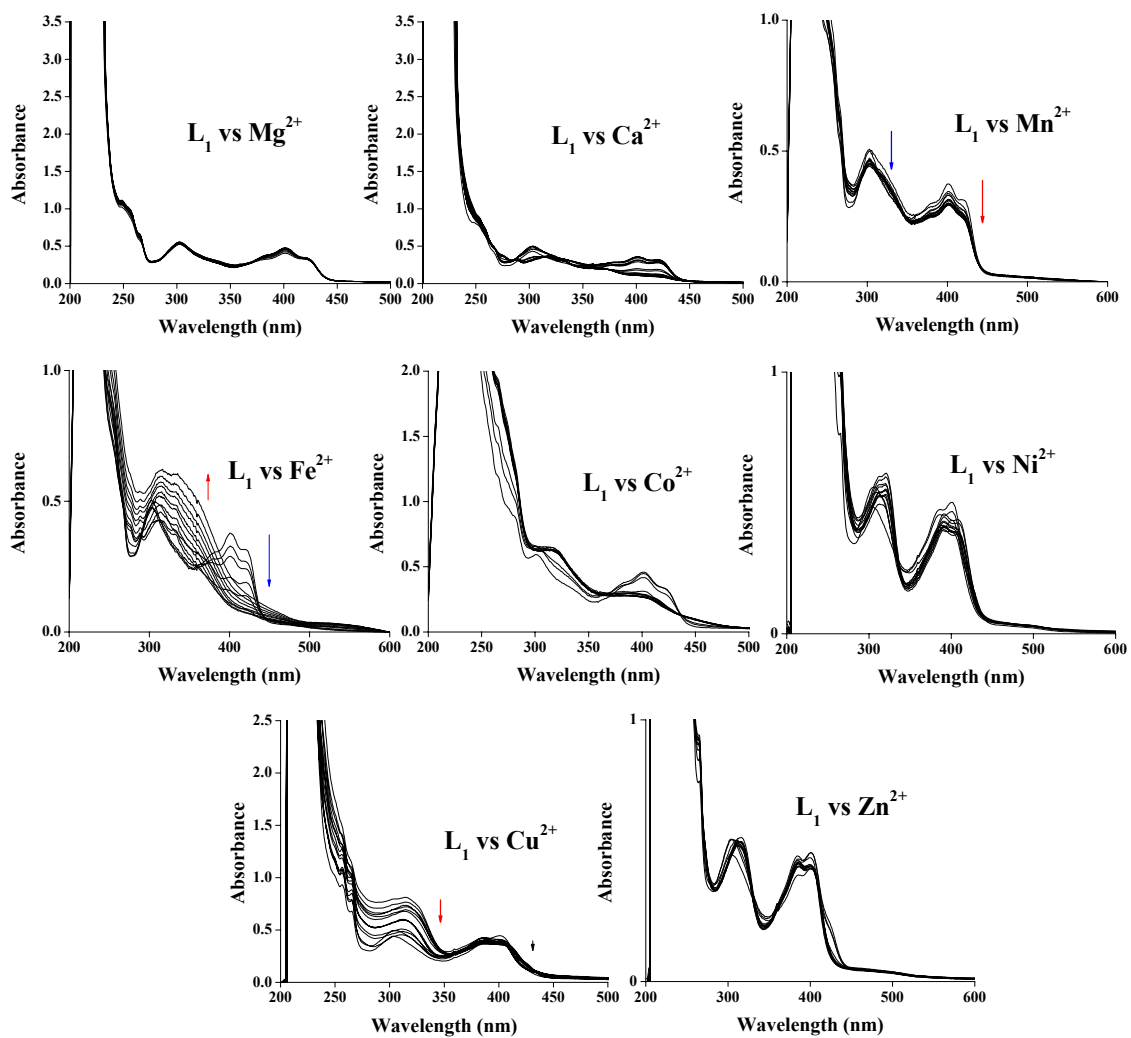

Figure F 02a. UV-Vis absorption spectra of  $M^{2+}$  titration with  $L_1$  in MeOH.

**SI 03a: Fluorescence titration for L<sub>2</sub> against Cu<sup>2+</sup> and Zn<sup>2+</sup> in CH<sub>3</sub>OH**

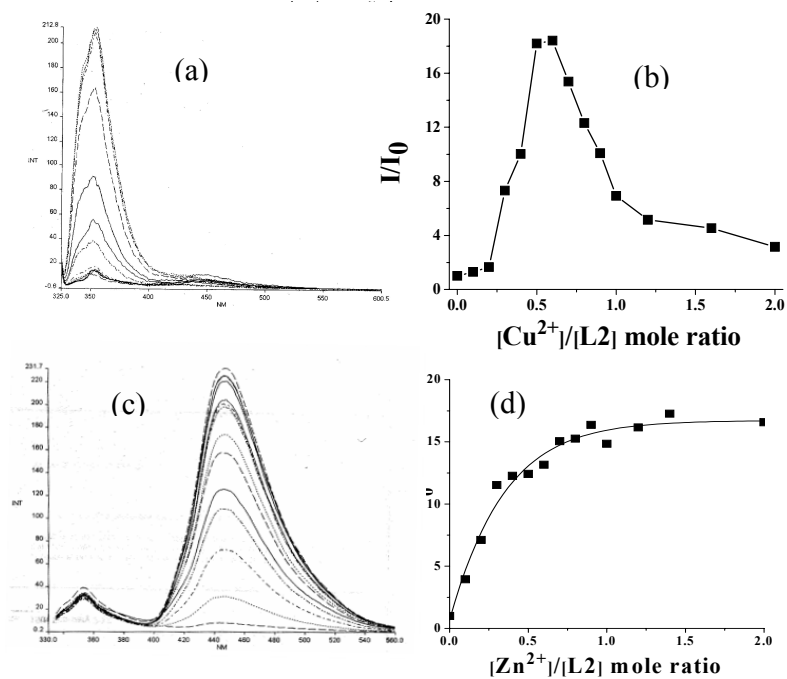

**SI 03a:** Fluorescence titration for L<sub>2</sub> against (a) & (b) vs. Cu<sup>2+</sup> and (c) & (d) vs. Zn<sup>2+</sup> in CH<sub>3</sub>OH

**SI 03b: Absorption titration for  $L_2$  against  $M^{2+}$  in  $CH_3OH$  ( $M=Mn^{2+}$ ,  $Fe^{2+}$ ,  $Co^{2+}$ ,  $Ni^{2+}$ )**

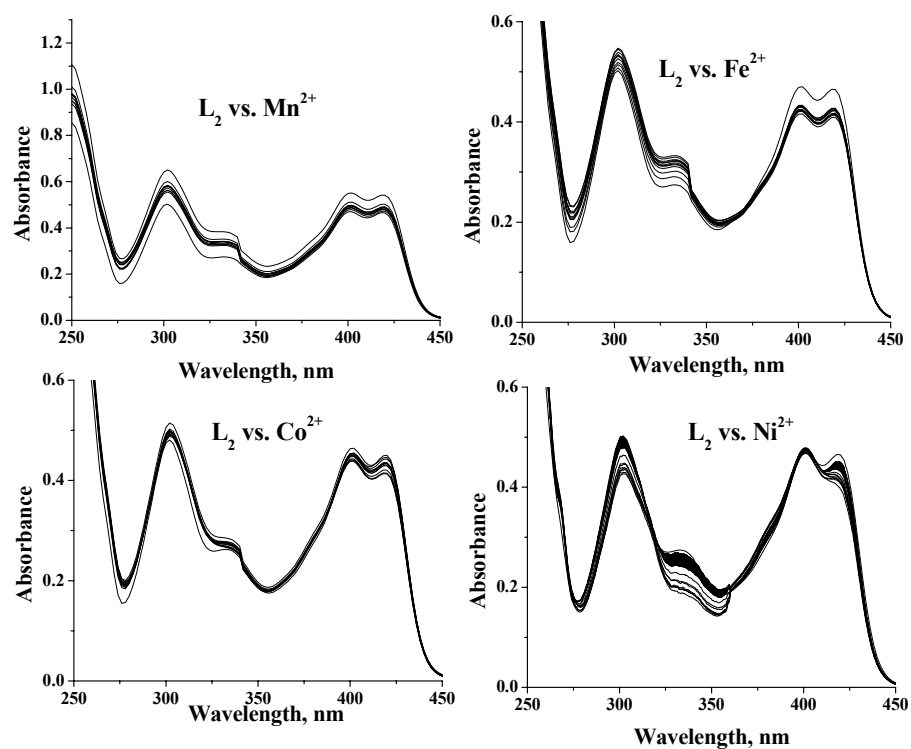

Figure F 03b. UV-Vis absorption spectra of  $M^{2+}$  titration with  $L_2$  in MeOH.



**SI 04: Absorption titration of  $L_3$  against  $M^{2+}$  in methanol**

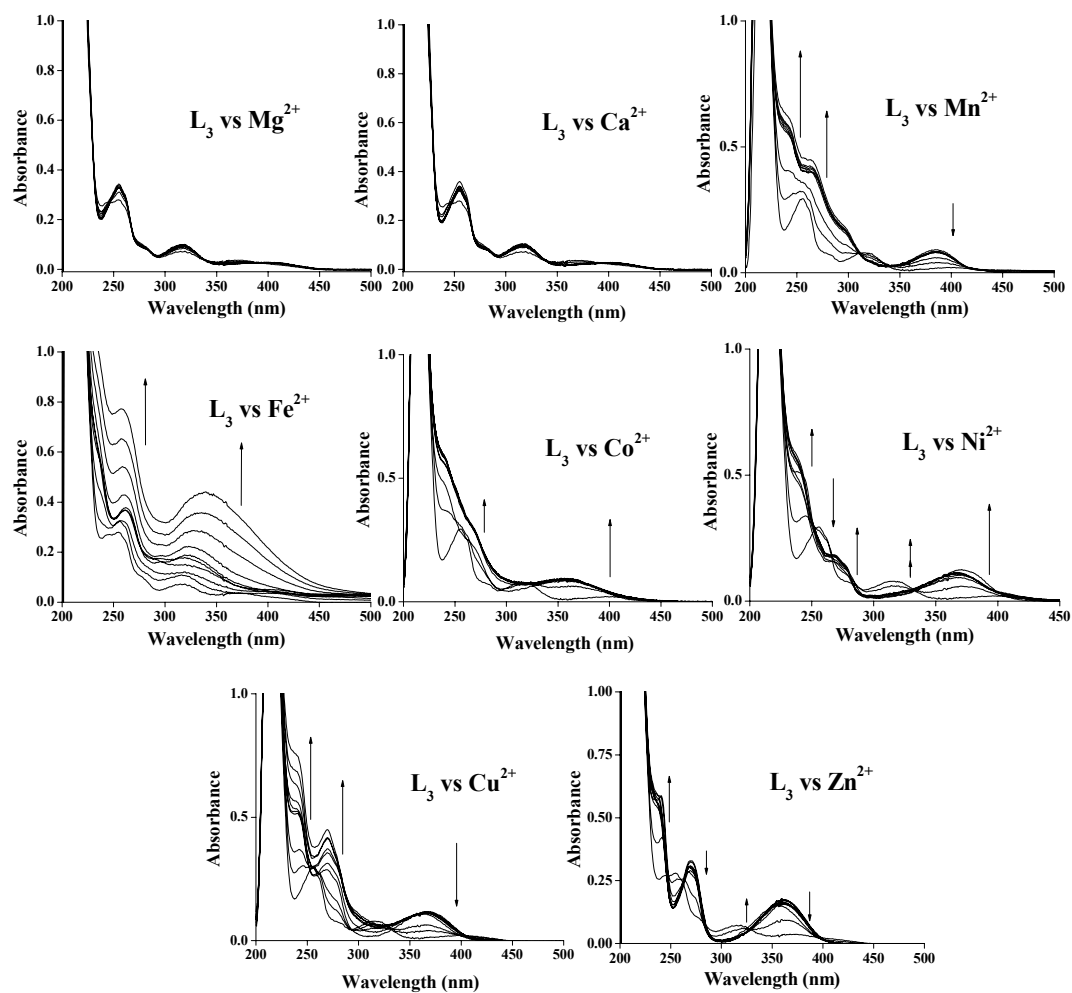

Figure F 04a. UV-Vis absorption spectra of  $M^{2+}$  titration with  $L_3$  in MeOH.

SI 05: Competitive metal ion titration for  $L_1$  in methanol.

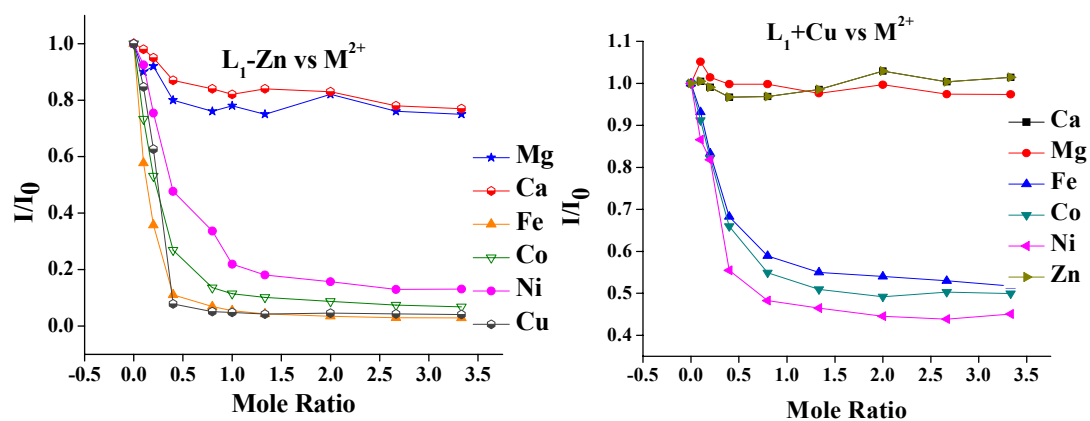

Figure F 05a. Competitive titration in methanol using  $L_1$ . (a) (RNI + 1.0 eq  $Zn^{2+}$ ) vs.  $M^{2+}$  and (b) (RNI + 0.5 eq  $Cu^{2+}$ ) vs.  $M^{2+}$ .

**SI 06: Fluorescence spectral traces for L<sub>3</sub> in methanol and HEPES buffer**

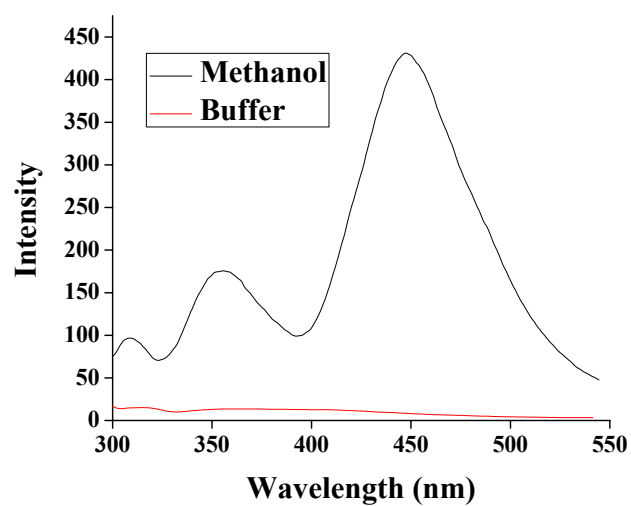

Figure F 06a. Fluorescence intensity vs. wavelength plot for L<sub>3</sub> in methanol and HEPES buffer (pH = 7.2) showing the decrease in intensity upon changing the solvent.

SI 07: Fluorescence titration in HEPES buffer for L<sub>3</sub> against M<sup>2+</sup>

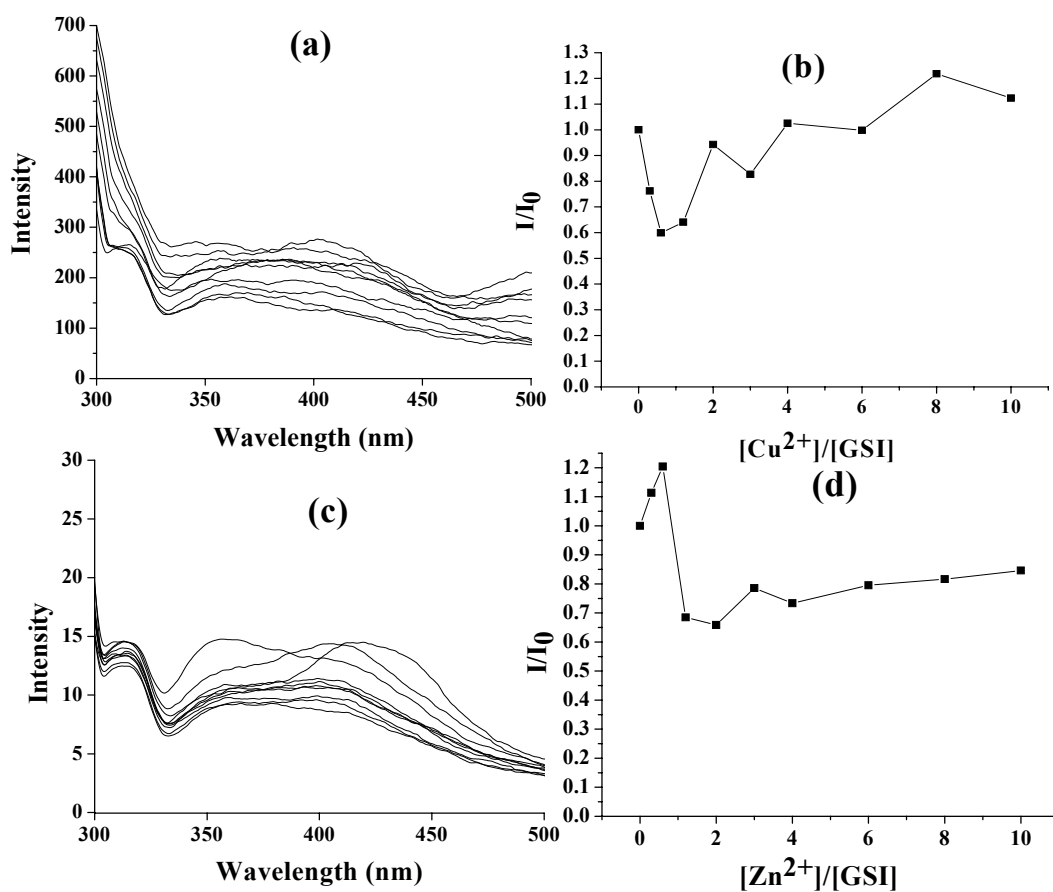

Figure F 07a. Fluorescence titration of GSI against Cu<sup>2+</sup> and Zn<sup>2+</sup> in HEPES buffer (pH = 7.0) showing no response at all to those two metal ions; (a) Intensity vs. Wavelength trace for GSI vs. Cu<sup>2+</sup>; (b) Relative fluorescence intensity (I/I<sub>0</sub>) vs. Mole Ratio plot for GSI vs. Cu<sup>2+</sup>; (c) Intensity vs. Wavelength trace for GSI vs. Zn<sup>2+</sup>; (d) Relative fluorescence intensity (I/I<sub>0</sub>) vs. Mole Ratio plot for GSI vs. Zn<sup>2+</sup>.

**SI 08: Absorption titration for L<sub>2</sub> against Cu<sup>2+</sup> and Zn<sup>2+</sup> in HEPES buffer**

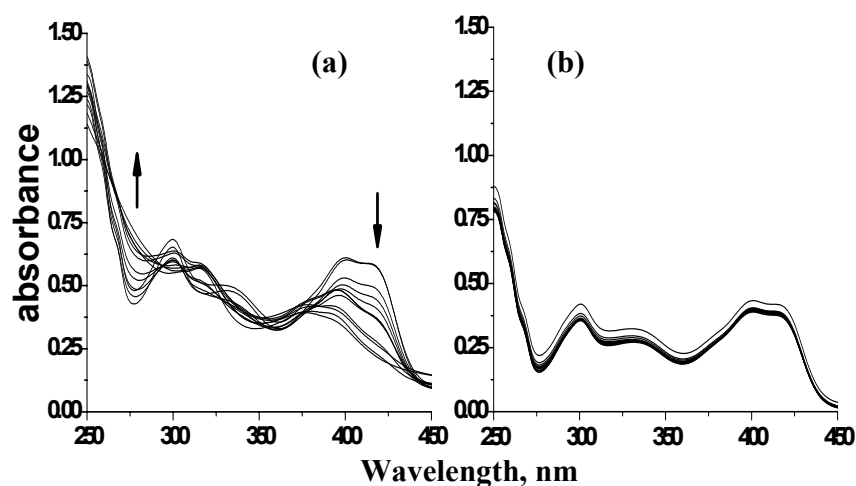

Figure F 08a. UV-Vis absorption spectra measured in the titration of M<sup>2+</sup> with L<sub>2</sub> in HEPES buffer at different [M<sup>2+</sup>]/[L<sub>2</sub>] mole ratios ranging from 0.0 to 2.0: (a) Cu<sup>2+</sup>; and (b) Zn<sup>2+</sup>.

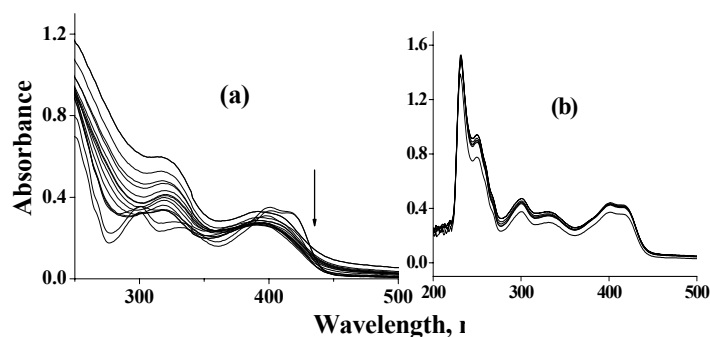

Figure F 08b. UV-Vis absorption spectra of M<sup>2+</sup> titration with L<sub>1</sub> in HEPES buffer for (a) Cu<sup>2+</sup>; (b) Zn<sup>2+</sup>

**SI 09:  $^1\text{H}$ -NMR and mass spectral traces for the Cu(II) complexes, viz., 1, 2 and 3.**

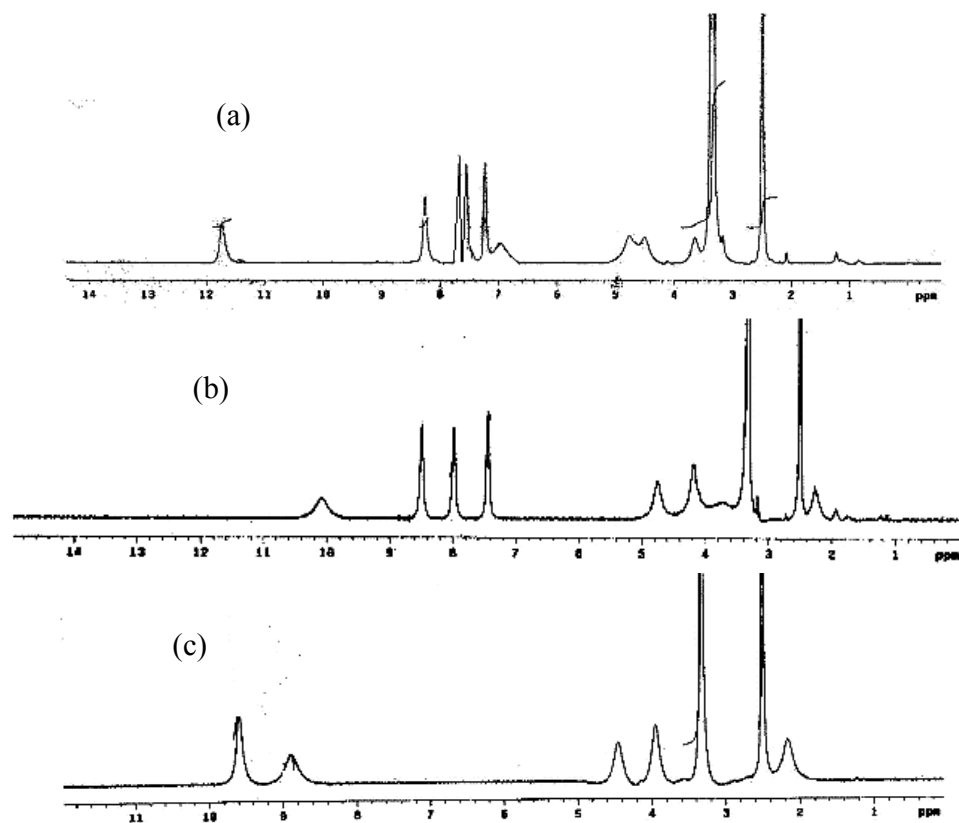

Figure F 09a.  $^1\text{H}$  NMR of (a) **1**, (b) **2**, and (c) **3**. All are recorded in  $\text{DMSO-d}_6$ .

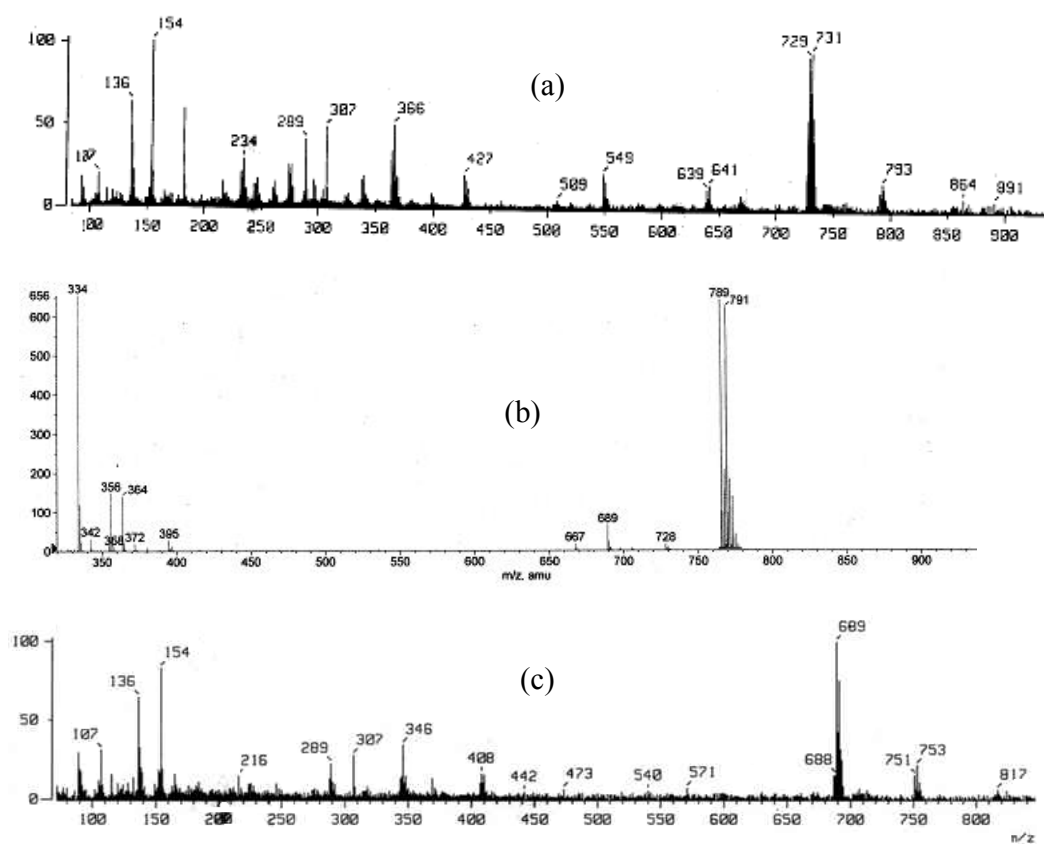

Figure F 09b. Mass spectra: (a) **1**, (b) **2** and (c) **3**.

### SI 10: EPR spectral studies

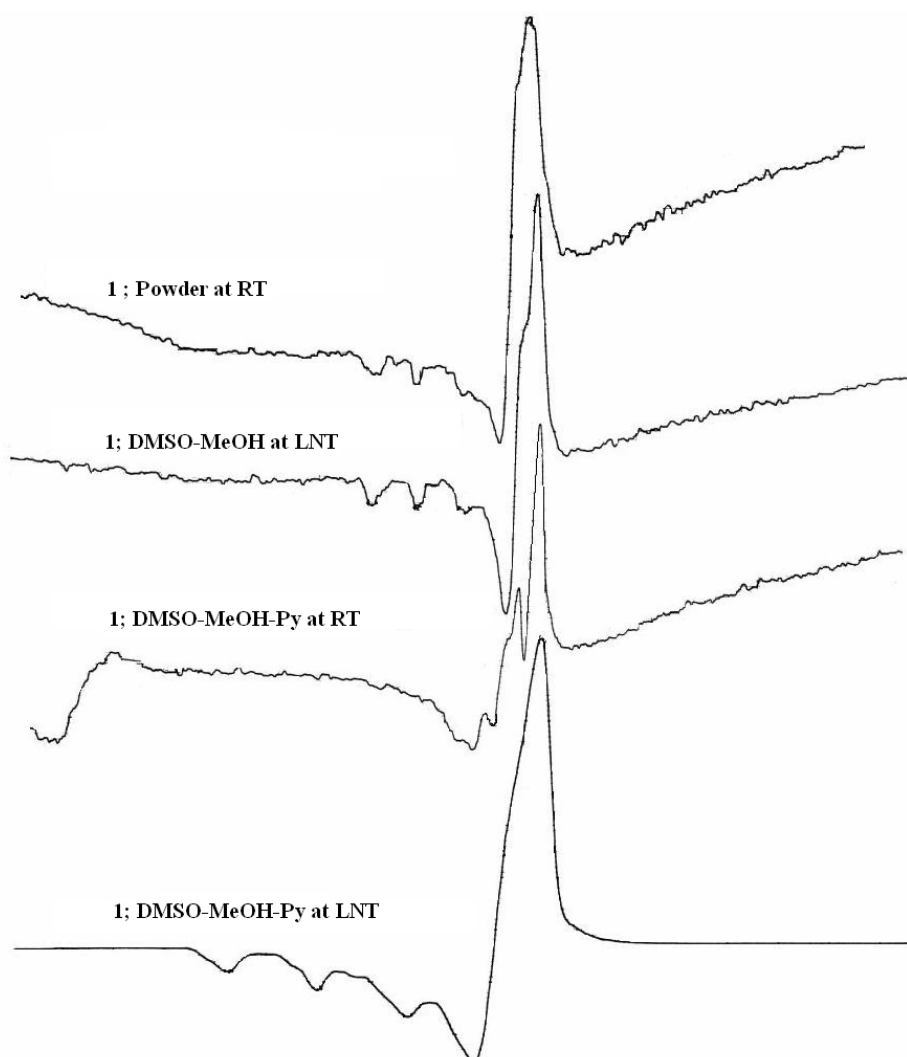

Figure F 10a. EPR spectral traces of **1** under different conditions mentioned on the spectrum. Py = pyridine; LNT = Liquid nitrogen temperature.



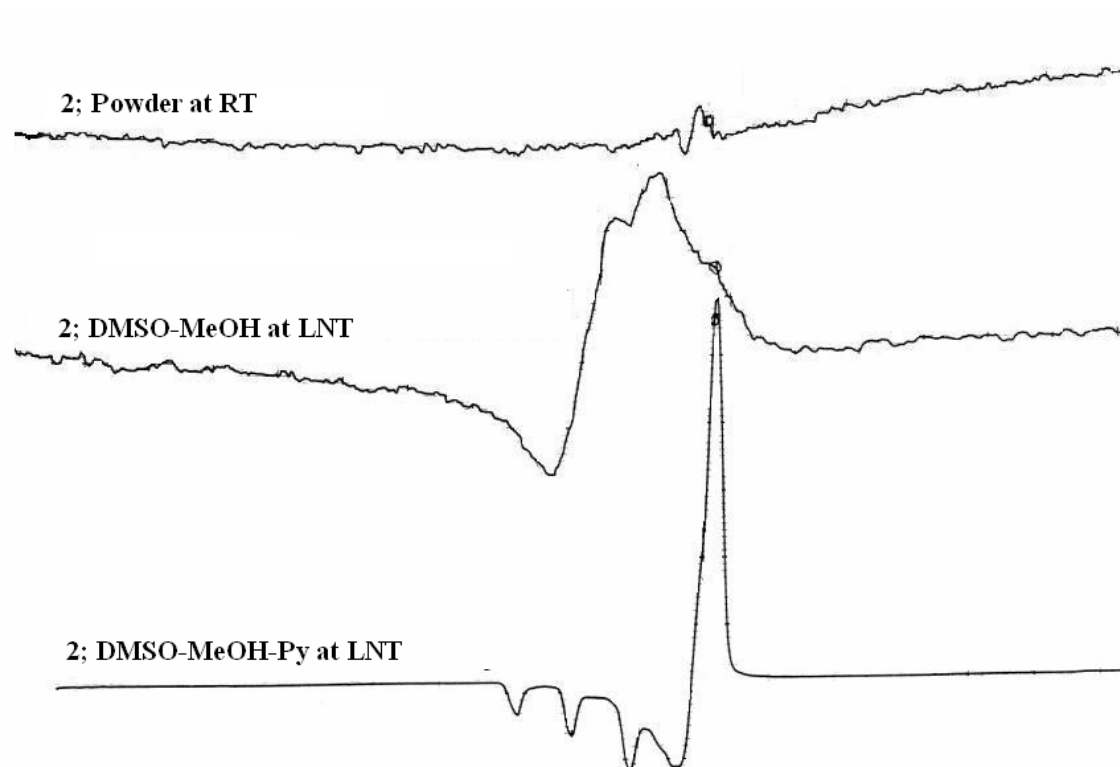

Figure F 10b. EPR spectral traces of **2** under different conditions mentioned on the spectrum. Py = pyridine; LNT = Liquid nitrogen temperature.

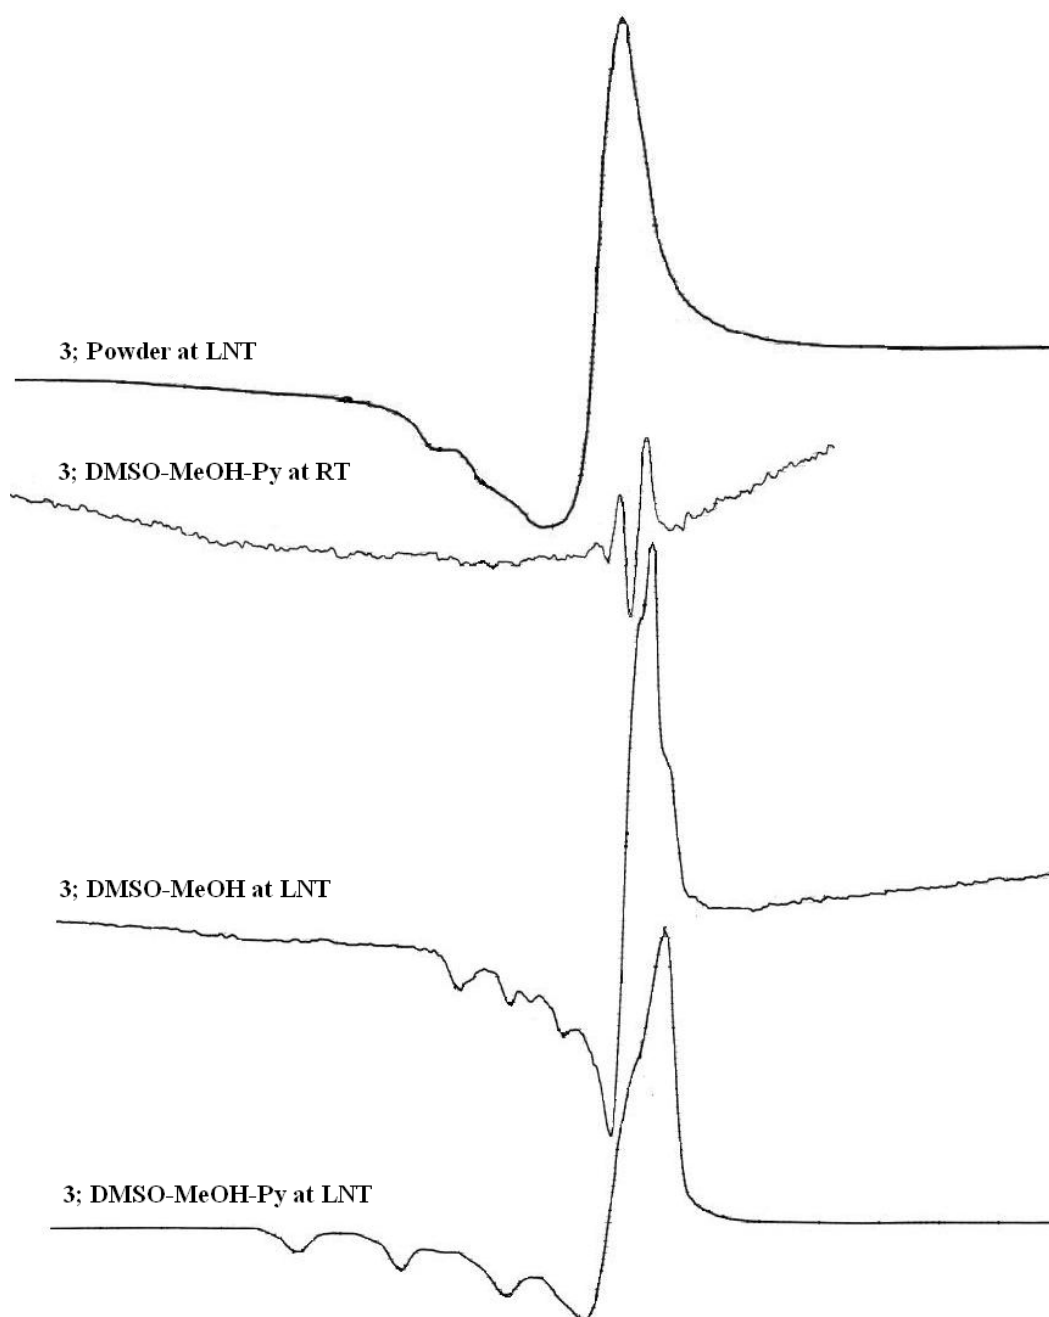

Figure F 10c. EPR spectral traces of **3** under different conditions mentioned on the spectrum. Py = pyridine; LNT = Liquid nitrogen temperature.

SI 11

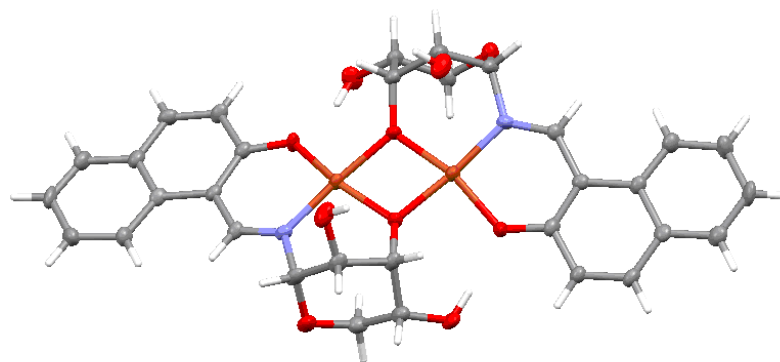

1a-(i)

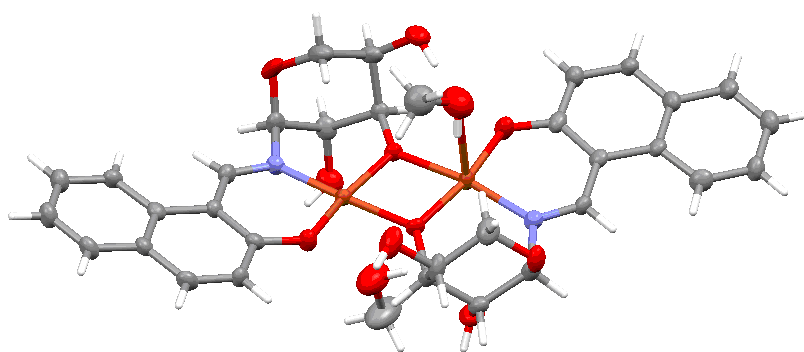

1a-(ii)

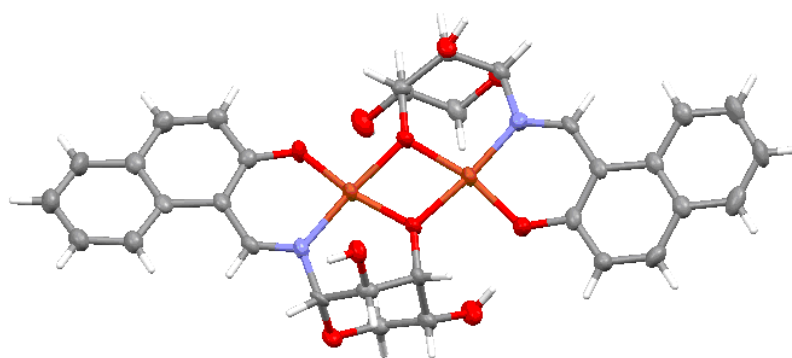

1a-(iii)

Figure F 11: ORTEP view of the three dinuclear complexes 1a-(i), 1a-(ii) and 1a-(iii) in the asymmetric unit in **1a** at 150 K with thermal ellipsoids cut at the 50% probability level for non-H atoms. The dimer 1a-(i) is bounded to solvent while two others are not.

**SI 12.** H-bond data for the structures **1a**, **1b** and **3**

| D-H—[Å]           | d <sub>H...A</sub> (Å) | d <sub>D...A</sub> (Å) | <DHA(°) | Symmetry            |
|-------------------|------------------------|------------------------|---------|---------------------|
| <b>1 a</b>        |                        |                        |         |                     |
| O31—H31O .. O34   | 2.013                  | 2.840                  | 168.0   | -x+2,y+1/2,-z+1     |
| O34—H34 .. O41    | 1.900                  | 2.654                  | 148.0   | x,y,z               |
| O40—H40 .. O30    | 2.150                  | 2.835                  | 139.0   | x,y,z               |
| O41—H41 .. O30    | 2.496                  | 3.269                  | 154.0   | x,y,z               |
| O32—H32 .. O6     | 1.941                  | 2.762                  | 166.0   | x,y,z               |
| O16--H16O .. O27  | 1.910                  | 2.719                  | 161.0   | x,y,z               |
| O20--H20O .. O16  | 2.010                  | 2.816                  | 162.0   | -x+1, y-1/2, -z     |
| O22 -- H22O .. O9 | 1.810                  | 2.641                  | 173.0   | x,y,z               |
| O26--H26O .. O33  | 2.040                  | 2.858                  | 164.0   | -x+1, y-1/2, -z     |
| O27--H27O .. O12  | 1.860                  | 2.671                  | 163.0   | x,y,z               |
| O33—H33O .. O22   | 1.900                  | 2.721                  | 165.0   | x,y+1,z             |
| <b>1 b</b>        |                        |                        |         |                     |
| O2 -- H2O .. O6   | 1.960                  | 2.791                  | 171.0   | x,y,z               |
| O2 -- H2O .. O7   | 2.030                  | 2.757                  | 144.0   | x,y,z               |
| O3 -- H3O .. O4   | 1.860                  | 2.698                  | 172.0   | -x+2,+y,-z+1        |
| O7 -- H6 .. O5    | 2.700                  | 3.438                  | 142.7   | -x+2,+y,-z+1        |
| O6 -- H6 .. O6    | 2.664                  | 3.366                  | 142.0   | -x+2,+y,-z+1        |
| O6 -- H6 .. O7    | 1.986                  | 2.710                  | 144.0   | -x+2,+y,-z+1        |
| <b>3</b>          |                        |                        |         |                     |
| O9—H9-----O1      | 1.852                  | 2.668                  | 173.3   | x,y,z               |
| O3—H3-----O7      | 1.911                  | 2.692                  | 158.8   | x,y,z               |
| O4—H4-----O111    | 2.144                  | 2.860                  | 145.9   | x,y,z               |
| C18—H18----O111   | 2.676                  | 3.601                  | 173.2   | -<br>x+1,+y+1/2,z+1 |
| O11—H11-----O4    | 1.925                  | 2.733                  | 167.3   | -x+1,y+1/2,-z+1     |
| C7—H7-----O111    | 2.638                  | 3.548                  | 165.5   | -x+1,y+1/2,-z+2     |
| O5—H5-----O111    | 2.213                  | 2.970                  | 152.1   | -x+1,y+1/2,-z+2     |
